# Supplementary material
Source: HighWire-hosted journal article supplement (https://oem.bmj.com/content/80/11/603)

Figure SM1. Level of time coverage of the Italian MM surveillance system by period of incidence and Region. Italy, 1993-2018

| REGIONS               | Period of incidence |      |      |      |      |      |      |      |      |      |      |      |      |           |           |
|-----------------------|---------------------|------|------|------|------|------|------|------|------|------|------|------|------|-----------|-----------|
|                       | 1993                | 1994 | 1995 | 1996 | 1997 | 1998 | 1999 | 2000 | 2001 | 2002 | 2003 | 2004 | 2005 | 2006-2015 | 2016-2018 |
| Piemonte              |                     |      |      |      |      |      |      |      |      |      |      |      |      |           |           |
| Valle D'Aosta         |                     |      |      |      |      |      |      |      |      |      |      |      |      |           |           |
| Liguria               |                     |      |      |      |      |      |      |      |      |      |      |      |      |           |           |
| Lombardia             |                     |      |      |      |      |      |      |      |      |      |      |      |      |           |           |
| Bolzano province      |                     |      |      |      |      |      |      |      |      |      |      |      |      |           |           |
| Trento province       |                     |      |      |      |      |      |      |      |      |      |      |      |      |           |           |
| Veneto                |                     |      |      |      |      |      |      |      |      |      |      |      |      |           |           |
| Friuli-Venezia Giulia |                     |      |      |      |      |      |      |      |      |      |      |      |      |           |           |
| Emilia-Romagna        |                     |      |      |      |      |      |      |      |      |      |      |      |      |           |           |
| Toscana               |                     |      |      |      |      |      |      |      |      |      |      |      |      |           |           |
| Marche                |                     |      |      |      |      |      |      |      |      |      |      |      |      |           |           |
| Umbria                |                     |      |      |      |      |      |      |      |      |      |      |      |      |           |           |
| Lazio                 |                     |      |      |      |      |      |      |      |      |      |      |      |      |           |           |
| Abruzzo               |                     |      |      |      |      |      |      |      |      |      |      |      |      |           |           |
| Molise                |                     |      |      |      |      |      |      |      |      |      |      |      |      |           |           |
| Campania              |                     |      |      |      |      |      |      |      |      |      |      |      |      |           |           |
| Puglia                |                     |      |      |      |      |      |      |      |      |      |      |      |      |           |           |
| Basilicata            |                     |      |      |      |      |      |      |      |      |      |      |      |      |           |           |
| Calabria              |                     |      |      |      |      |      |      |      |      |      |      |      |      |           |           |
| Sicilia               |                     |      |      |      |      |      |      |      |      |      |      |      |      |           |           |
| Sardegna              |                     |      |      |      |      |      |      |      |      |      |      |      |      |           |           |

## Legend

|  |                    |
|--|--------------------|
|  | complete incidence |
|  | partial incidence  |
|  | No surveillance    |

Figure SM2. Pleura age-standardized incidence rates (ASR) by year of incidence in young people ( $\leq 50$  years old at diagnosis) in Italian national Mesothelioma register (ReNaM) by gender. Italy, 1993-2017

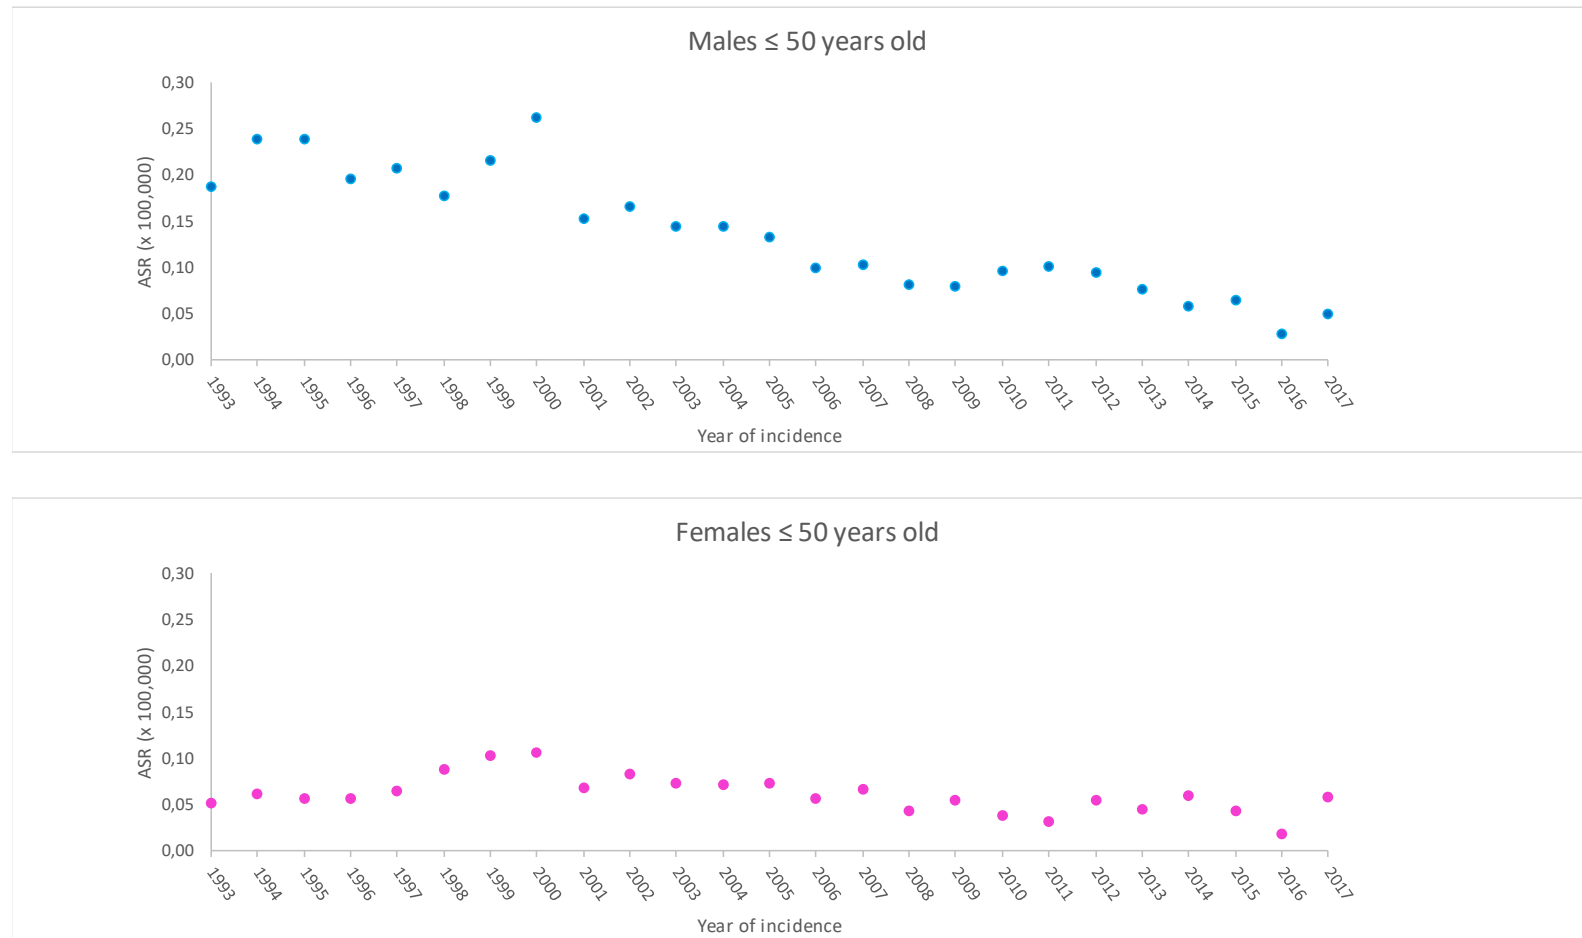

Figure SM3. Pleura age-standardized incidence rates (ASR) by year of incidence in elderly people (> 50 years old at diagnosis) in Italian national Mesothelioma register (ReNaM) by gender. Italy, 1993-2017

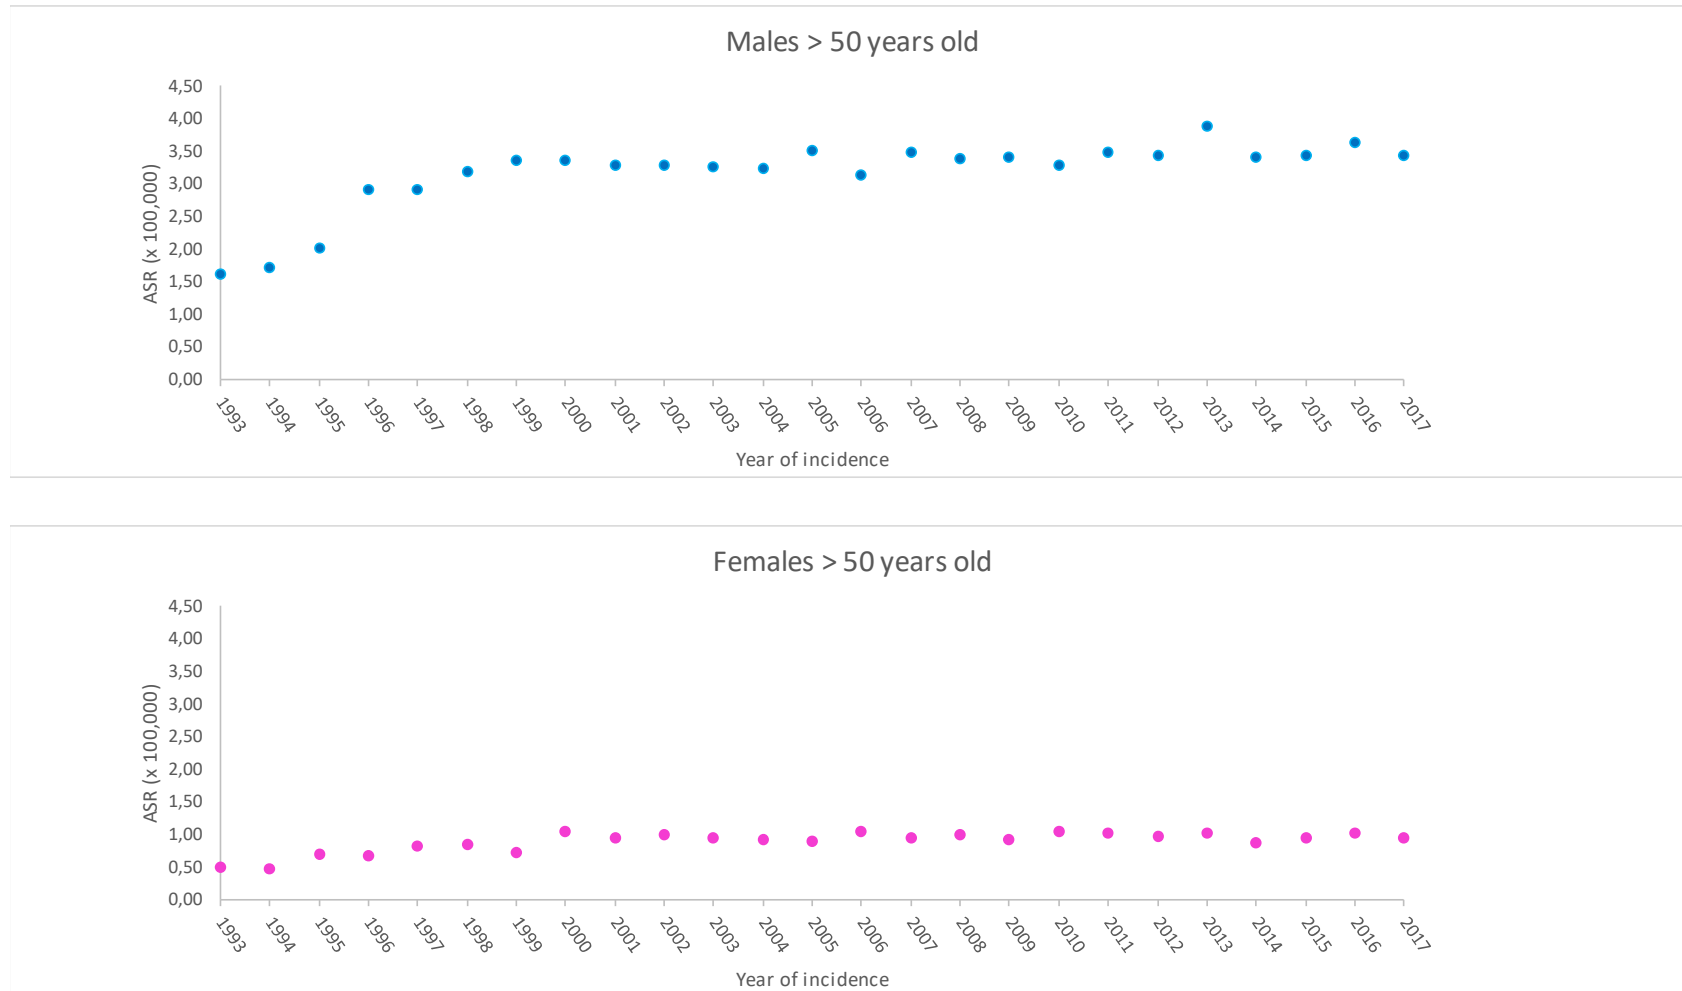

Figure SM4. Peritoneum age-standardized incidence rates (ASR) by year of incidence in young people ( $\leq 50$  years old at diagnosis) in Italian national Mesothelioma register (ReNaM) by gender. Italy, 1993-2017

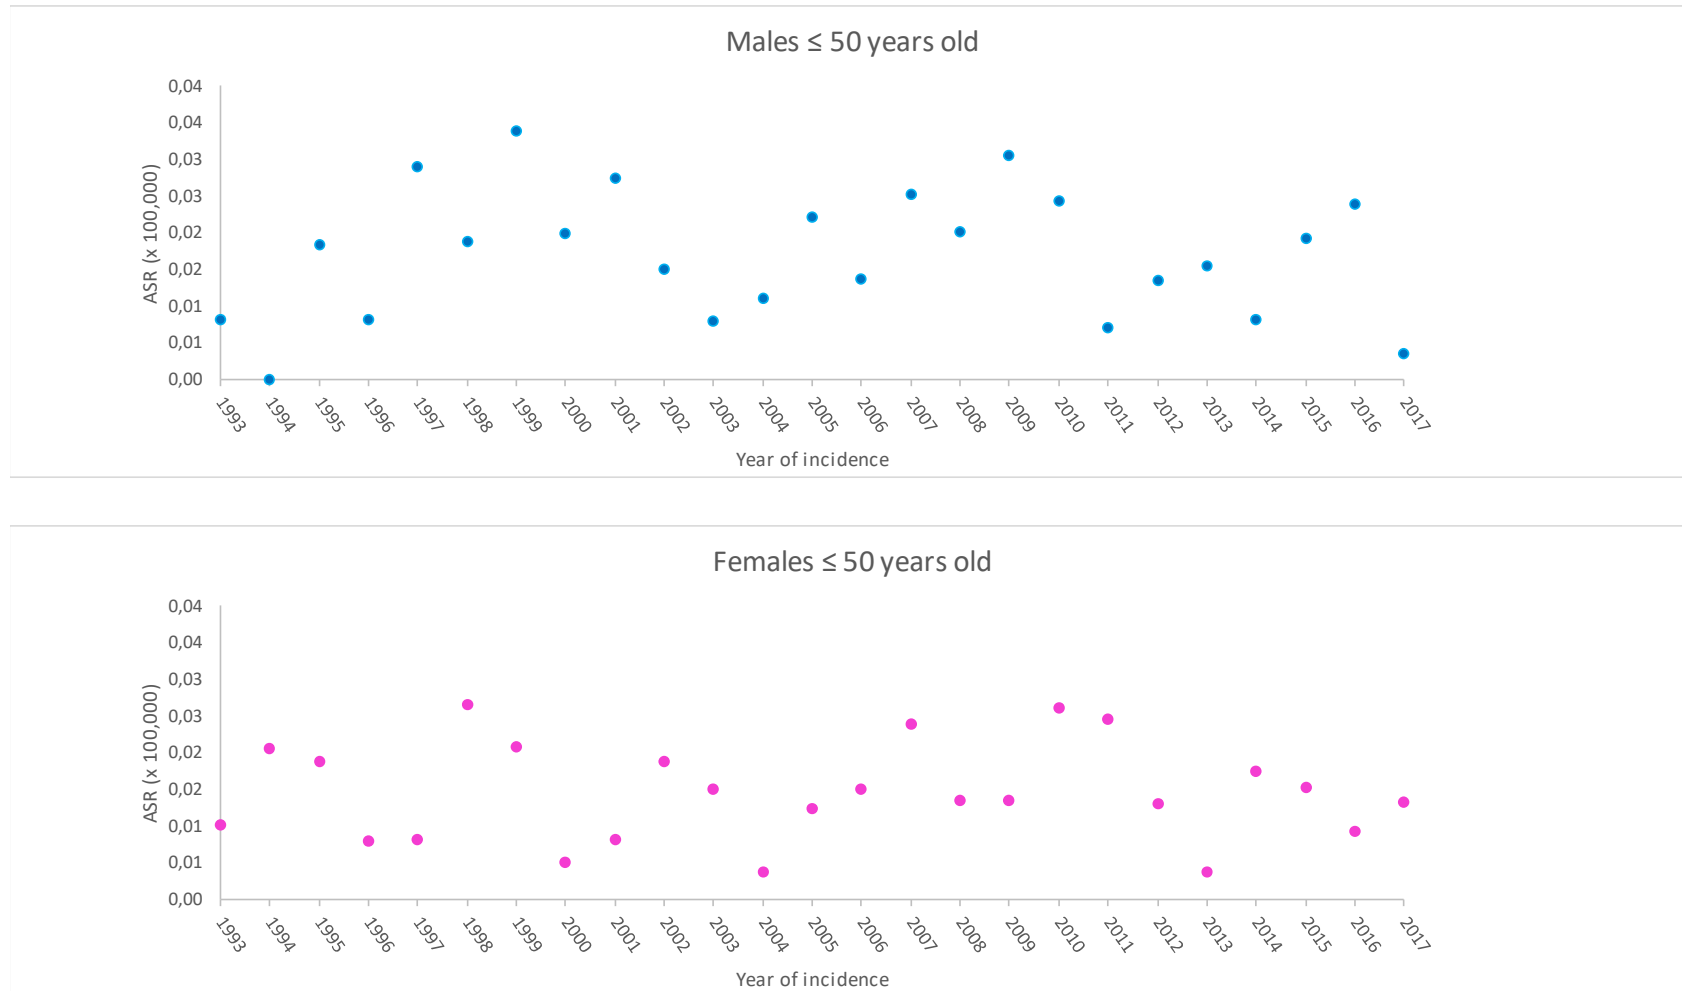

Figure SM5. Peritoneum age-standardized incidence rates (ASR) by year of incidence in elderly people (> 50 years old at diagnosis) in Italian national Mesothelioma register (ReNaM) by gender. Italy, 1993-2017

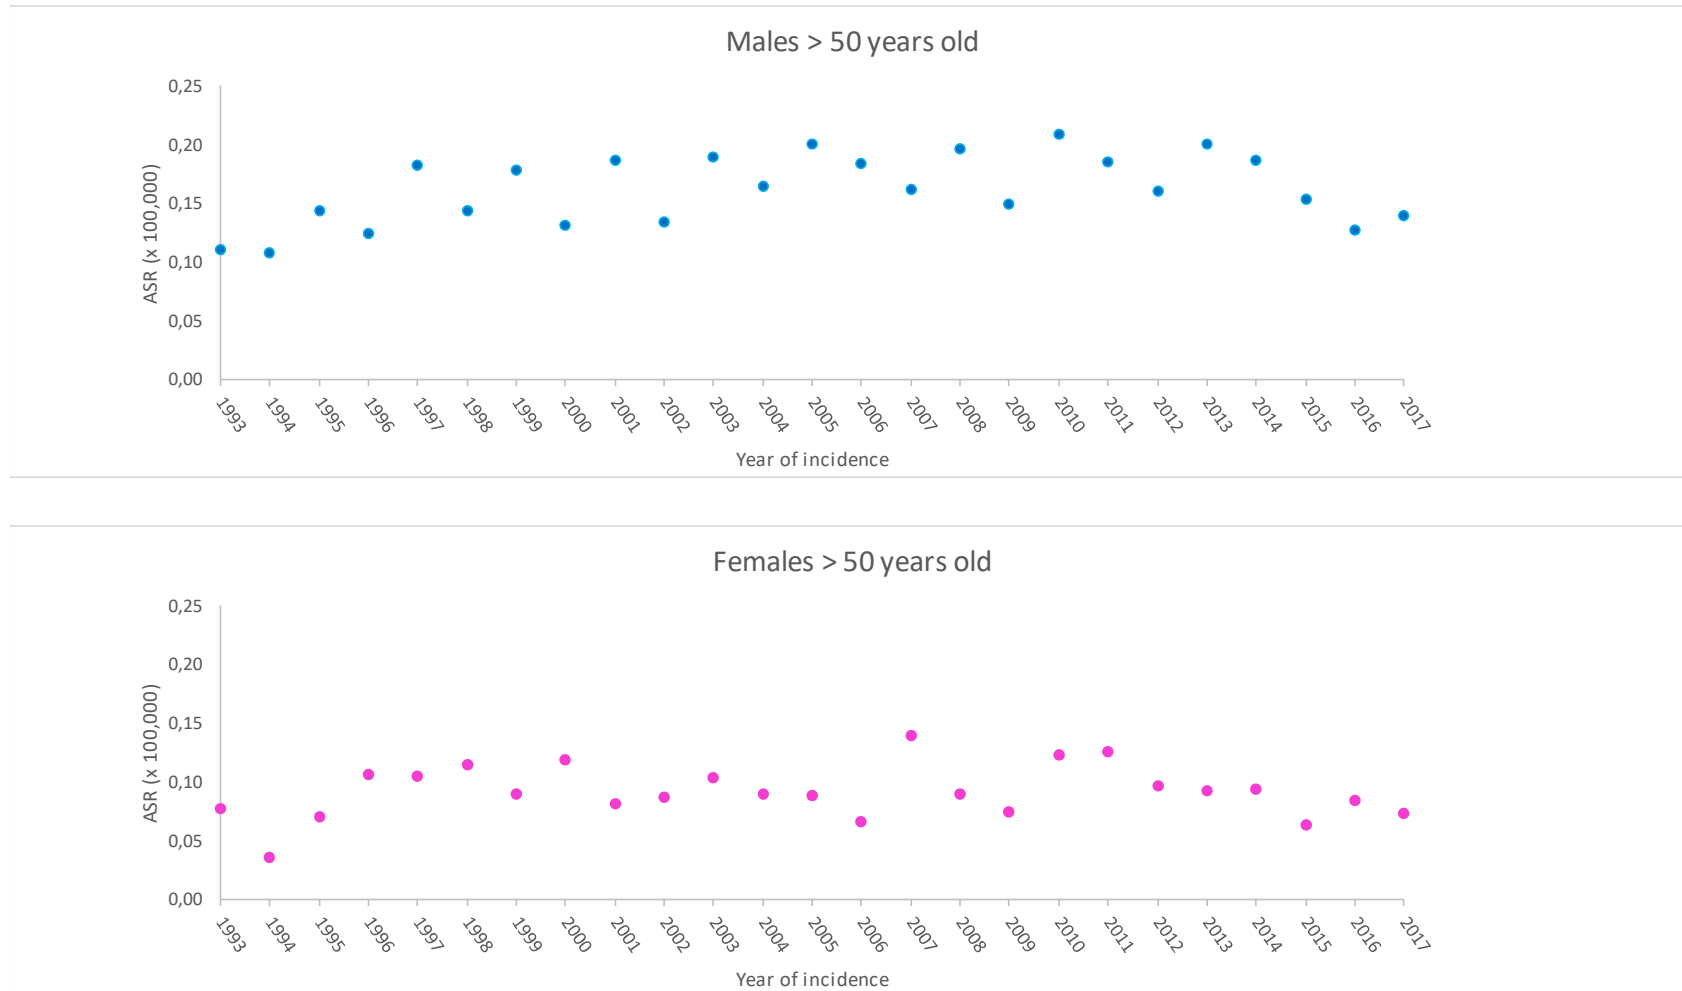

Supplement: inline-supplementary-material-1 [file inline-supplementary-material-1.pdf]
